# Supplementary material
Source: ML conference proceedings conference paper supplement (https://openreview.net/forum?id=76w7bsdViZf)
Supplement: supplementary_material [file attachment]

## 397 A Discussion

398 Our benchmark brings a new perspective to classification, as we not only seek models that predict  
399 accurately, but also predict for the right reasons. Assessing model performance using accuracy alone  
400 can obscure key misconceptions held by models, which may only become apparent when models  
401 are deployed to new domains at test time. Moreover, design decisions such as training strategy and  
402 architecture may affect the degree to which spurious features are relied upon, as observed in [26];  
403 this dataset and accompanying benchmark can reveal these model differences. Finally, we emphasize  
404 the need to understand model behavior under “bad” data; that is, images where the object of interest  
405 is not centered or large, unlike most cases. With models becoming increasingly data hungry, it is  
406 inevitable that some portion of the data will not capture objects in ideal conditions. Further, certain  
407 objects simply are not well suited to be captured prominently (i.e. large and centered) in square  
408 photos. Figuring out how to learn to recognize objects from these suboptimal data conditions will  
409 be an important challenge to extend the impressive performance of deep classifiers from standard  
410 datasets to many more realistic settings.

411 With Hard ImageNet, the community can evaluate the capacity of any ImageNet trained model to  
412 faithfully learn challenging objects, and also explore how going beyond single class label annotations  
413 can lead to improved image classifiers. While segmentation masks are expensive to collect, procedures  
414 that are much more automated already exist [35], and we envision newer ones are likely to emerge  
415 with time. Also, the procedure with which we ranked images was largely automated, indicating that  
416 these types of annotations are by no means prohibitively expensive. We hope Hard ImageNet can  
417 lead to new perspectives on both training and evaluation paradigms for image classification.

## 418 B Distinguishing Hard ImageNet from Related Challenge Datasets

419 Our work is inspired by other challenge datasets that focus on improving deep classifiers by aggregating  
420 edge cases where usually strong performance falters. We highlight two datasets in particular:  
421 ObjectNet [3] and ImageNet-A [16]. Both of these datasets include samples where spurious correlations  
422 are broken, leading to dramatically lower accuracy. Further, these datasets consist of clean  
423 images, as opposed to other challenge sets that make synthetic changes [40, 30].

424 We now outline some key distinctions between Hard ImageNet and these datasets. First, ObjectNet  
425 and ImageNet-A only contain test sets. We include a training set in Hard ImageNet because the  
426 central goal of our work is for the community to develop new algorithms that can learn to recognize  
427 objects without relying on spurious cues, even when the spurious signals are very strong in the  
428 training data. To this end, we also introduce two new forms of annotation (object segmentation and  
429 image ranking), with hopes of challenging the community to explore training paradigms beyond  
430 single-label supervision. Lastly, model performance on ObjectNet and ImageNet-A is evaluated using  
431 *accuracy*. In contrast, we present three alternative evaluation metrics leveraging the richer annotations  
432 of Hard ImageNet. In spirit, our evaluation is orthogonal to the traditional metric of accuracy, as  
433 we shift the focus from *what* models predict to *how* they predict. We believe that the reliability and  
434 trustworthiness of deep models hinges on their use of appropriate reasoning structures. That is, if  
435 a model predicts correctly but for the wrong reasons, the model may act erratically when deployed.

436 We greatly value the inspiring work of these earlier challenge datasets and recognize the similarities of  
437 their work to our contribution, though we believe that Hard ImageNet may open the door to understanding  
438 deep classifier performance, specifically with respect to spurious feature reliance, in a new light.

## 439 C Improving Models with Hard ImageNet Annotations

440 In this section, we begin the exploration of harnessing Hard ImageNet’s annotations for improved  
441 model classification. Namely, we leverage object segmentations and image rankings to reduce model  
442 reliance on spurious features while performing Hard ImageNet classification. We focus our study on  
443 finetuned models pretrained on ImageNet, using ResNet50 and DeiT (Small) as in Section 4. We

444 keep features fixed during finetuning, only optimizing the parameters of a new final layer for the  
 445 15-way Hard ImageNet classification.

446 We employ two approaches for mitigating spurious feature reliance. [35] propose **Core Risk**  
 447 **Minimization** (CoRM) as an alternative to ERM when segmentations of core (i.e. not spurious)  
 448 regions are available; Hard ImageNet’s object segmentations fulfill this prerequisite. Specifically,  
 449 the objective of CoRM is to minimize classification error over the distribution of images *with noise*  
 450 *applied to non-core regions*, so that the optimal classifier predicts correctly even when spurious  
 451 features are corrupted. In that work, *random noising*, where small amounts of Gaussian noise are  
 452 added to non-core regions with probability  $p = 0.5$ , and *saliency regularization*, where the  $\ell_2$  norm of  
 453 the gradient on non-core pixels is added to the classification loss, were applied in tandem to improve  
 454 relative core sensitivity (an analogous metric to *RFS*). [20] propose **Deep Feature Reweighting**  
 455 (DFR), in which retraining a final linear layer using a *balanced dataset* reduces spurious feature  
 456 reliance. The balanced dataset consists of a subset of the training data containing an equal portion of  
 457 samples with and samples without spurious features, essentially breaking spurious correlations that  
 458 impede generalization to minority groups. Using Hard ImageNet’s image rankings, we extract the  
 459 top and bottom 100 images for each class to form the spurious-balanced subset.

| Method                 |              | Ablation Accuracies ( $\downarrow$ ) |              |              |              | <i>RFS</i> ( $\uparrow$ ) |                | Saliency ( $\uparrow$ ) |
|------------------------|--------------|--------------------------------------|--------------|--------------|--------------|---------------------------|----------------|-------------------------|
| CoRM                   | DFR          | None ( $\uparrow$ )                  | Gray         | Gray BBox    | Tile         | $\sigma = 0.25$           | $\sigma = 0.5$ | IoU                     |
| Finetuned DeiT (Small) |              |                                      |              |              |              |                           |                |                         |
| $\times$               | $\times$     | <b>96.79</b>                         | 84.22        | 80.48        | 81.15        | -0.19                     | -0.35          | 20.90                   |
| $\checkmark$           | $\times$     | 96.39                                | <b>81.02</b> | 78.74        | 80.75        | <b>0.02</b>               | <b>-0.19</b>   | 21.57                   |
| $\times$               | $\checkmark$ | 96.66                                | 81.28        | <b>77.01</b> | 77.94        | -0.20                     | -0.33          | 21.63                   |
| $\checkmark$           | $\checkmark$ | 96.52                                | 82.35        | <b>77.01</b> | <b>77.81</b> | -0.10                     | -0.29          | <b>21.99</b>            |
| Finetuned ResNet50     |              |                                      |              |              |              |                           |                |                         |
| $\times$               | $\times$     | 94.25                                | 75.94        | 69.39        | 67.38        | -0.18                     | <b>-0.27</b>   | 18.44                   |
| $\checkmark$           | $\times$     | 92.91                                | 76.20        | 69.12        | 68.32        | <b>-0.08</b>              | <b>-0.27</b>   | <b>20.43</b>            |
| $\times$               | $\checkmark$ | <b>94.39</b>                         | 73.53        | 67.51        | 66.71        | -0.27                     | -0.35          | 18.39                   |
| $\checkmark$           | $\checkmark$ | 91.31                                | <b>72.59</b> | <b>63.64</b> | <b>63.90</b> | -0.23                     | -0.31          | 20.35                   |

Table 1: Final layer retraining improves faithful learning on Hard ImageNet. Results shown for entire benchmark under two different training approaches: i) Core Risk Minimization (CoRM) via *random background noising* and *saliency regularization*, and ii) deep feature reweighting (DFR) using a *spurious-balanced training subset*. We also report results for the combination of the two approaches and ordinary finetuning (as a baseline) under two architectures. Relative Foreground Sensitivity (*RFS*) is evaluated under two  $\ell_\infty$  noise levels, indicated by  $\sigma$ . Saliency refers to *saliency alignment* as measured by intersection over union (IoU).

460 Table 1 shows that these two methods can considerably reduce model reliance on spurious features,  
 461 improving numbers across all metrics in our benchmark. Between the two approaches, CoRM appears  
 462 to lead to more improvement in saliency alignment and *RFS*, while DFR yields better results for  
 463 ablation. Combining CoRM and DFR leads to even better performance with respect to accuracies  
 464 under ablation. While improvements are at times small, we note that in these experiments, the vast  
 465 majority of model parameters are left unchanged, as we only train a new final layer. We leave the  
 466 door open to new approaches for improving the *faithful* learning of Hard ImageNet objects, including  
 467 training models from scratch.

## 468 D Evaluation of Additional Pretrained Models

469 In addition to the transformer and convolutional neural networks (DeiT and ResNet50) explored in  
 470 the main text, we evaluate four other deep classifiers. Namely, we investigate Swin Transformer [24],  
 471 ConViT [6], DenseNet161 [18], and VGG16 [33]. As seen in table 2, our results on new models

472 corroborate the findings of the main text. Specifically, we see that across models, classifying Hard  
 473 ImageNet objects leads to higher accuracy under ablation, lower RFS scores, and lower saliency  
 474 alignment, compared to classifying RIVAL20 objects. This implies that certain properties inherent to  
 475 the data in Hard ImageNet makes it far more challenging to learn to classify without heavily relying  
 476 on spurious cues.

| Model                   | Ablation Accuracies ( $\downarrow$ ) |       |           |       | $RFS$ ( $\uparrow$ ) | Saliency ( $\uparrow$ ) |
|-------------------------|--------------------------------------|-------|-----------|-------|----------------------|-------------------------|
|                         | None ( $\uparrow$ )                  | Gray  | Gray BBox | Tile  | $\sigma = 0.25$      | IoU                     |
| Hard ImageNet           |                                      |       |           |       |                      |                         |
| Swin                    | 80.59                                | 61.19 | 59.97     | 59.30 | -0.01                | 4.28                    |
| Convit                  | 79.92                                | 60.11 | 59.97     | 55.93 | -0.12                | 22.37                   |
| Densenet161             | 57.68                                | 37.06 | 30.05     | 29.65 | -0.26                | 18.10                   |
| Vgg16                   | 71.83                                | 46.63 | 41.37     | 42.86 | -0.53                | 16.80                   |
| RIVAL20                 |                                      |       |           |       |                      |                         |
| Swin                    | 86.96                                | 30.13 | 25.18     | 18.50 | 0.44                 | 6.64                    |
| Convit                  | 85.74                                | 21.64 | 25.28     | 16.68 | 0.31                 | 35.89                   |
| Densenet161             | 78.67                                | 7.58  | 3.03      | 2.73  | 0.40                 | 43.95                   |
| Vgg16                   | 76.74                                | 6.88  | 3.03      | 3.44  | 0.80                 | 30.08                   |
| Hard ImageNet - RIVAL20 |                                      |       |           |       |                      |                         |
| Swin                    | -6.36                                | 31.05 | 34.80     | 40.80 | -0.45                | -2.36                   |
| Convit                  | -5.82                                | 38.47 | 34.69     | 39.25 | -0.43                | -13.53                  |
| Densenet161             | -20.98                               | 29.48 | 27.02     | 26.92 | -0.67                | -25.85                  |
| Vgg16                   | -4.91                                | 39.76 | 38.34     | 39.42 | -1.32                | -13.27                  |

Table 2: Evaluation of additional pretrained models (no finetuning). All models have higher accuracies under ablation, lower RFS scores, and lower saliency alignment on Hard ImageNet than RIVAL20.

## 477 E Overview of Salient ImageNet

478 We refer readers to [35] for all details related to the Salient ImageNet-1M data and collection  
 479 procedure. For completeness, we offer brief discussion of the methods relevant to this paper. Namely,  
 480 we elaborate on the way in which class-feature pairs were annotated as core or spurious (i.e. a  
 481 neural feature was annotated as detecting input regions that were spurious with respect to the given  
 482 class label). Recall that the motivation for closer inspection of Hard ImageNet classes was that all  
 483 class-feature pairs for Hard ImageNet were annotated as spurious.

484 Salient ImageNet annotations first correspond to labeling 5 neural features as core or spurious for  
 485 each of the 1000 ImageNet classes, resulting in 5000 class-feature pair binary annotations (core or  
 486 spurious). Neural feature refers to the nodes in the penultimate layer of a deep classifier. Specifically,  
 487 the neural features of an  $\ell_2$  adversarially trained ResNet50 were inspected because adversarially  
 488 robust models have been observed to be more interpretable. For each class, the five neural features  
 489 annotated were those that contribute the most to the logit of the given class. The average contribution  
 490 of a neural feature to a class can easily be computed as the product of the average feature activation  
 491 and the weight of the linear layer connecting the feature to the class logit.

492 Of the 5000 class-feature pairs annotated, 4370 (87.4%) were deemed to be core, signifying that  
 493 in most cases, the model effectively learned to use the appropriate features in classification. For  
 494 342 classes, at least one feature was annotated as spurious. However, only a small minority (the  
 495 15 classes comprising Hard ImageNet) had all five features annotated as spurious. This motivated  
 496 our hypothesis that there were inherent properties of the data in Hard ImageNet that leads standard  
 497 supervised classification training algorithms to result in models that rely on spurious cues. We do  
 498 not claim that the classes in Hard ImageNet have the strongest spurious cues, nor do we claim that  
 499 models do not rely on spurious cues for classes outside of Hard ImageNet; only that strong spurious

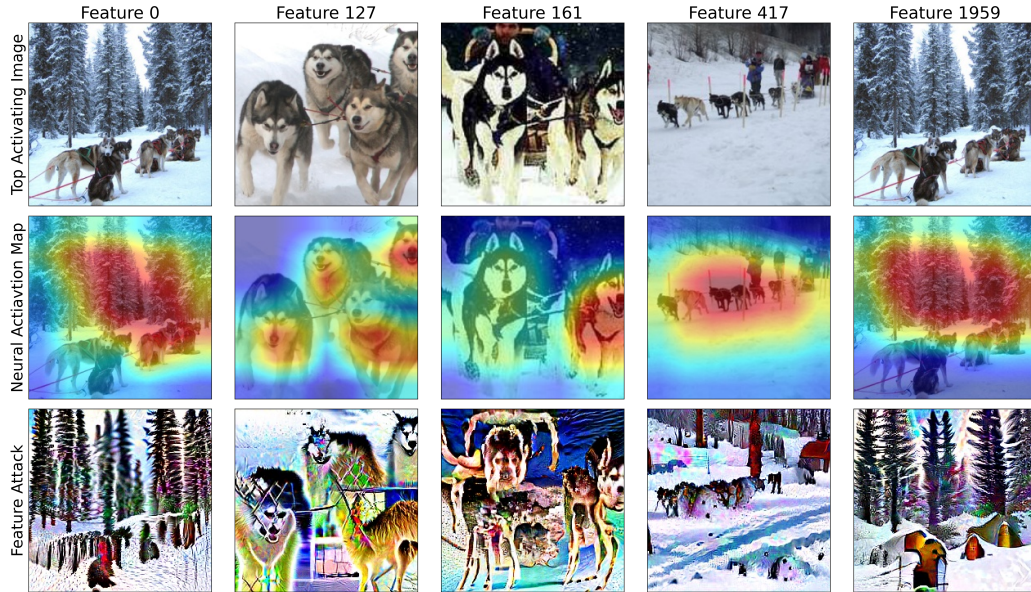

Figure 11: Example visualizations of the five most important neural features for the class **Dog Sled** used in Salient ImageNet annotation. From left to right, the features may be described as focusing on *trees*, *dogs*, *dogs*, *dogs in snow*, and *trees*.

500 cues exist in Hard ImageNet, and studying this data can yields insights related to causes and solutions  
 501 for image classifier reliance on spurious features.

502 There are three key visualization techniques applied in order to reveal the function a neural feature  
 503 serves over images from some class: natural images that highly activate the feature, ii. neural  
 504 activation maps which highlight the input region responsible for the neural feature activation, and iii.  
 505 feature attacks that optimize the input image to amplify feature activation. These visualizations are  
 506 shown for the top five activating images per class-feature pair to five human annotators, who each  
 507 vote to describe the focus of the feature as either on the main object (core) or a separate object or the  
 508 background (spurious). The final annotation of the class feature pair is determined by majority vote.

509 We show the top activating image, its neural activation map, and a feature attack performed on it for  
 510 each of the five features annotated for the Dog Sled and Patio classes in Figures [11](#) and [12](#) respectively.  
 511 Visualizations for all Hard ImageNet classes (as well as the rest of ImageNet) can be viewed here:  
 512 [www.salient-imagenet.cs.umd.edu](http://www.salient-imagenet.cs.umd.edu)

513 Lastly, we note that Salient ImageNet-1M also consists of soft segmentations masks for the objects  
 514 for all images, *except* for those belonging to Hard ImageNet classes. This discrepancy is because the  
 515 soft segmentation masks are constructed from the neural activation maps of core features. Thus, since  
 516 Hard ImageNet classes have no annotated core features, Salient ImageNet-1M lacks segmentations  
 517 for those classes. Therefore, the segmentations collected for the Hard ImageNet dataset effectively  
 518 complete Salient ImageNet-1M. These masks can be potentially leveraged to train more reliable  
 519 models, though this is an open research problem with little existing work, since annotations of this  
 520 kind (segmentations) have not been prevalent for classification at scale until these recent works.

## 521 **F Inspecting Prediction Confidence on Ablated Images**

522 One may argue that it is unreasonable to fault a model for classifying an ablated image to its original  
 523 class, particularly when it is not an option to predict some other more suitable class. After all, the  
 524 model simply returns probabilities that an image belongs to each class, and chooses the class that is  
 525 most likely. A similar metric would be to inspect prediction confidence instead of accuracy. This

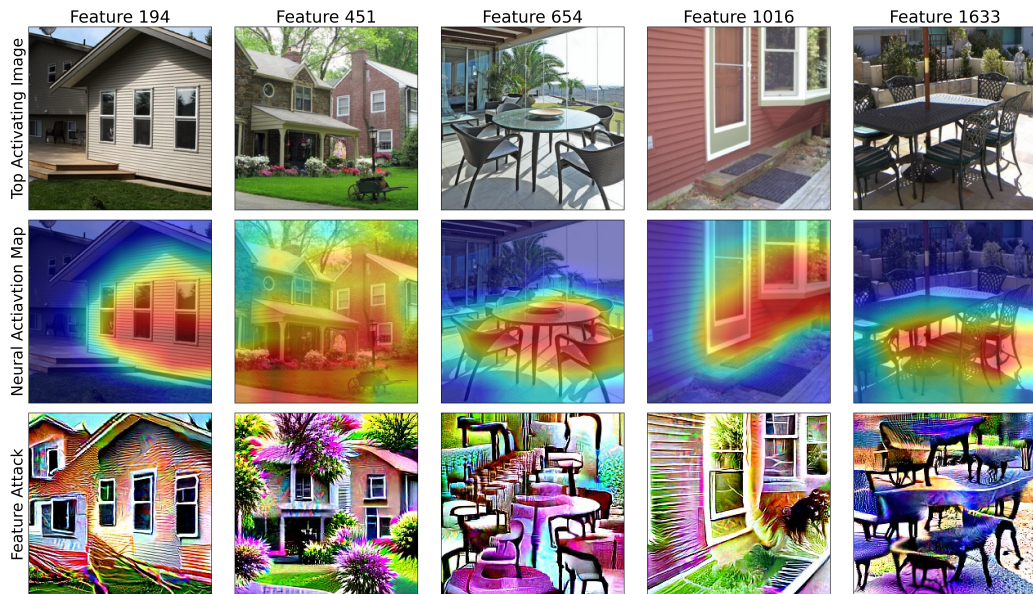

Figure 12: Example visualizations of the five most important neural features for the class **Patio** used in Salient ImageNet annotation. From left to right, the features may be described as focusing on *windows*, *house*, *furniture*, *window jambs*, and *patio chairs*.

526 way, we no longer directly fault a model for still predicting the original class, but still reward the  
 527 calibration of a model. That is, it may be more reasonable to hope a model at least predicts an ablated  
 528 image to the true class with far less confidence.

529 We explore this related metric in this section so to validate our ablation analyses using the more  
 530 canonical (though potentially slightly more problematic) accuracy measure. Quite simply, we  
 531 aggregate prediction confidences of the true class (not the predicted class) for each ablated image, and  
 532 view the average confidence. As figure 13 shows, we very closely corroborate the findings obtained  
 533 when inspecting accuracy under ablation.

534 While using accuracy under ablation directly may be imperfect, we find that it is an intuitive measure  
 535 that may be more easily interpretable than our noise or saliency based metrics. Furthermore, accuracy  
 536 is the standard evaluation metric for classification, and is highly correlated with true class prediction  
 537 confidence, which as detailed above, reveals analogous findings and is less affected by the fact that  
 538 desired classification behavior on ablated images is unclear. Thus, we present accuracy in the main  
 539 text, though we argue that either accuracy or true class prediction confidence under ablation can be  
 540 used in practice. We provide implementations for both metrics.

## 541 G Datasheet

542 We now share more detail on our dataset, following the *Datasheets for Datasets* protocol [10]. Access  
 543 all code and data at the following link: [mnoayeri.github.io/HardImageNet](https://mnoayeri.github.io/HardImageNet)

### 544 G.1 Motivation

545 Hard ImageNet was created to assess and improve image classifier capacity to learn to objects  
 546 that commonly occur with strong spurious cues. We hypothesized that despite high classification  
 547 accuracy, models were incorrectly learning the objects corresponding to Hard ImageNet classes.  
 548 Going beyond single class-label annotations allowed for quantitative demonstration of this undesirable  
 549 (and otherwise undetectable) behavior, as well as opening the door to new ways of improving models  
 550 on these challenging objects. The dataset was created by academics (namely from the University of

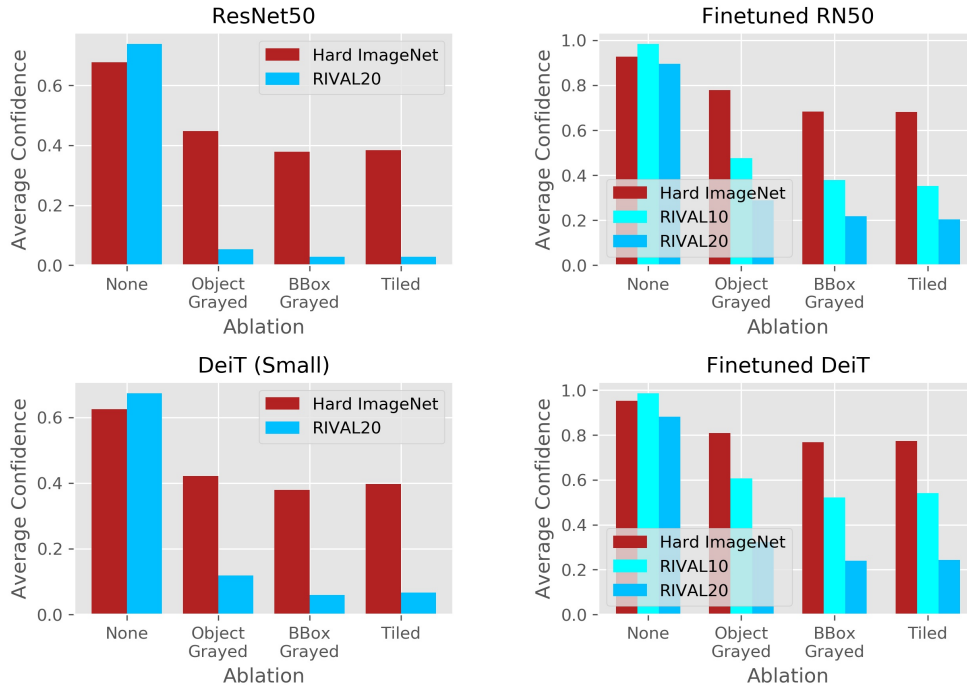

Figure 13: Probability (confidence) of true class under ablation. Confidence drops much less when Hard ImageNet objects are ablated than when RIVAL10 objects are ablated, exactly as observed for accuracy under ablation.

551 Maryland) for academic purposes, leveraging crowd annotations through Amazon’s Mechanical Turk  
 552 platform. Data collection was funded by an AWS Machine Learning Research Award.

## 553 G.2 Composition

554 Each instance consists of an image with a label and a binary segmentation mask corresponding to  
 555 the class object. Instances either fall in the training or validation split, which is consistent with  
 556 ImageNet’s split. Images in the training split additionally are ranked within their respective class by  
 557 the strength of spurious cues present, as determined in an automated procedure leveraging the neural  
 558 feature annotations of Salient ImageNet-1M [35]. Instances in the validation split are unlikely to be  
 559 noisy, as they consolidate five separate repetitions of annotations, while training set segmentations  
 560 may be noisier, though quality is generally ensured via qualification exams and attention checks.  
 561 Generally, the dataset does not relate to people, though many images do contain people (in fact, they  
 562 are a common spurious cue). It is unlikely that the data can be used to identify any individuals or  
 563 subpopulations, and we note that these pitfalls are inherited from the standard benchmark dataset  
 564 ImageNet, from where Hard ImageNet images are drawn. Nonetheless, we advise caution in using  
 565 and sharing images containing faces or otherwise prominently displaying people; we attempted to  
 566 avoid including such images in our figures to the best of our ability.

## 567 G.3 Collection Process

568 Images were drawn directly from ImageNet. Segmentations were collected via Amazon Mechanical  
 569 Turk. Image rankings were computed by inspecting the activations of particular neural features  
 570 in a  $\ell_2$  adversarially trained ResNet50 using an attack budget of  $\epsilon = 3$  (see [37] for more detail).  
 571 Segmentations were validated in the sense that quality was monitored via attention checks, where  
 572 annotators consistently achieved high IoUs with ground truth segmentations (average IoU of 0.76).  
 573 Validation set segmentations were validated across one another, by having five separate annotation

574 rounds and taking a pixel-wise majority to obtain final segmentations. The people involved in data  
575 collection were the first author and roughly 50 crowdworkers. The crowdworkers were paid 0.2 per  
576 segmentation, amounting to about \$12 to \$16 per hour. Workers were also eligible for bonuses of  
577 \$1, \$3 or \$7 for submitting 100, 250, or 500 segmentations respectively. Workers could collect a  
578 maximum of two bonuses: one for training images and one for validation images. We did not obtain  
579 IRB approval as our data annotation does not constitute human subject research as defined in federal  
580 regulation 45 CFR 46.102. Specifically, because we do not ask the human annotators information  
581 about themselves, they are not technically human subjects. We consulted our institution’s IRB to  
582 confirm that our study is exempt from approval. Nonetheless, we closely followed principles learned  
583 from the history of human subject research, such as providing informed consent (see [15]), ensuring the  
584 rights of the participants, anonymizing responses, keeping work entirely transparent, voluntary, and  
585 justly compensated. We strived to uphold the highest ethical standards in our procedures and actively  
586 maintain a healthy environment for our workers. Annotations were collected in a two week span.

#### 587 **G.4 Preprocessing/cleaning/labeling**

588 The only data cleaning performed was the consolidation of multiple rounds of annotations for  
589 validation set segmentations via pixel-wise majority vote.

#### 590 **G.5 Uses**

591 The dataset has not been used yet. We have developed a suite of evaluation metrics and demonstrated  
592 the utility of the dataset to improve model performance. We hope new training methods can be devel-  
593 oped leveraging the richer annotations of our dataset (relative to standard single label classification  
594 datasets). The dataset is not intended to replace large scale diverse datasets (e.g. ImageNet), but  
595 instead focuses on the specific subproblem of faithful learning despite strong spurious cues. Data and  
596 evaluation code will be publicly available and accessible at [mmoayeri.github.io/HardImageNet](https://mmoayeri.github.io/HardImageNet).

#### 597 **G.6 Distribution**

598 The dataset will be publicly distributed immediately upon submission. There are no limitations on  
599 use of this data.

#### 600 **G.7 Maintenance**

601 The authors will maintain the dataset website and answer any question regarding usage. We encourage  
602 questions to be asked via GitHub, though the authors can be contacted directly. The primary author  
603 can be emailed at [mmoayeri@umd.edu](mailto:mmoayeri@umd.edu). There are no current plans to release new versions to this  
604 dataset, though if that does occur, old versions will remain archived.

### 605 **H Mechanical Turk Forms**

606 We now provide screenshots for all Amazon Mechanical Turk Forms used to facilitate data collection  
607 in our study. For full transparency, we leave copies these forms up on the free analog of Mechanicla  
608 Turk so that any interested parties can view and familiarize themselves with the annotation platform.  
609 The forms are listed at the following link: [https://workersandbox.mturk.com/requesters/  
610 ATCCTSC7WNN97/projects](https://workersandbox.mturk.com/requesters/ATCCTSC7WNN97/projects). Figures [14], [15], and [16] showw the forms for the qualification exam,  
611 information/consent phase, and full data collection respectively.

## Object Segmentation: **QUALIFICATION EXAM**

There are fifteen images to segment, and a different object to segment in each image. The images have a numeric label to their top left. Segment the object corresponding to the number (e.g. label the balance beam in image 1). The segmented regions can be slightly rough; you may 'color outside the lines' -- **each image segmentation is intended to take about 30-45 seconds on average.**

If your segmentations are of high enough quality, you will be rewarded an extra \$2, and be invited to work on thousands more of these HITs. Future HITs will only consist of a single image per HIT.

**Use the zoom (z) and move (m) tools** to make the image you are working on large before segmenting it. To segment, we recommend the **polygon (p) tool**.

If you use the polygon tool, be sure to **click enter after each use to finalize your selection**. If you move on, it will be segmented as a different object.

**Click 'Instructions' tab below for example segmentations for each class.** Best of luck! Hope to work with you.

**Instructions**   **Shortcuts**   For each image, label the object in that image with the corresponding image (i.e. label the balance beam in image 1; click 'instructions' f... ⌘

**Instructions** ×

For each image, label the object with the corresponding number. See example segmentations below.

Example for object 1. Balance Beam



Example for object 2. Baseball Player

**Labels**   ⌵   🔒   ×

Choose a class below to add its instance(s).

- ▶ 1. Balance Beam
- ▶ 2. Baseball Player
- ▶ 3. Dog Sled
- ▶ 4. Gymnastic Horizontal Bar
- ▶ 5. Hockey Puck
- ▶ 6. Howler Monkey
- ▶ 7. Keyboard Space Bar
- ▶ 8. ...



Figure 14: Qualification exam.



### Consent form for Object Segmentation

Hello workers! Congratulations on qualifying. We are AI researchers from the University of Maryland. We are developing a dataset to improve robustness in machine learning models. Specifically, we are gathering segmentations for objects that models often use spurious cues to detect. For example, a model may look for car windows to detect a seatbelt, which can lead to mistakes when the model is deployed for a convertible.

We present the consent form below to confirm your voluntary participation in our study. The work will be similar to the qualification test, except at a much larger volume, and with a HIT corresponding to just one image (as opposed to the 15 in the qualification test).

To continue receiving HITs from us (and also collect a \$2 reward), mark 'I agree', hit submit, and await HITs to be released imminently (likely within a day).

---

### IMPORTANT NOTES

We will continue to monitor the quality of your work with randomly placed known segmentations. We will reject HITs from workers who perform poorly on these attention checks. We do not wish to reject HITs, but quality control is imperative, so we will be checking.

**\*\*\*Only complete this consent form once\*\*\*.** You will not receive payment for additional submissions, and you may be removed from the study.

Please look over the correct segmentations for the qualification exam below and take note of any mistakes that may have occurred in your submission. Common errors were: including the vertical stands for the horizontal gymnastics bar, including the entire backyard when segmenting patio (do not include grass when possible).



Segmentations do not need to be as precise as the above picture (we do not want to overwork you); recall, you can color slightly outside the lines so long as you are segmenting the correct object and not including much else.

Instructions | Shortcuts | Do you consent to the listed terms and agree to voluntarily take part in this study?

|                                                |                                                                                                                                                                                                                                                                                                                                                                                                                                                                                                                                                                                                                                                                                                                                                        |
|------------------------------------------------|--------------------------------------------------------------------------------------------------------------------------------------------------------------------------------------------------------------------------------------------------------------------------------------------------------------------------------------------------------------------------------------------------------------------------------------------------------------------------------------------------------------------------------------------------------------------------------------------------------------------------------------------------------------------------------------------------------------------------------------------------------|
| <b>Project Title</b>                           | <i>Hard ImageNet: Faithful Object recognition in the presence of Strong Spurious Cues</i>                                                                                                                                                                                                                                                                                                                                                                                                                                                                                                                                                                                                                                                              |
| <b>Purpose of the Study</b>                    | <i>This research is being conducted by Professor Soheil Feizi at the University of Maryland, College Park. We are inviting you to participate in this research project as a worker on Mechanical Turk. The purpose of this data collection is to gather object segmentations for challenging classes towards use in machine learning models.</i>                                                                                                                                                                                                                                                                                                                                                                                                       |
| <b>Procedures</b>                              | <i>The data collection involves coloring in regions of images where certain objects are present. The object to be annotated for each image is provided on a HIT by HIT basis.</i>                                                                                                                                                                                                                                                                                                                                                                                                                                                                                                                                                                      |
| <b>Confidentiality</b>                         | <i>Your responses to HITs in this study are anonymous and will not contain information that may personally identify you. Anonymous responses may be shared with other scientists for research purposes or communicated via a research paper or report.</i>                                                                                                                                                                                                                                                                                                                                                                                                                                                                                             |
| <b>Potential Risks and Discomforts</b>         | <i>The authors declare there is minimal risk for harm to participants. Images involved in this study are deemed to be benign and non-offensive.</i>                                                                                                                                                                                                                                                                                                                                                                                                                                                                                                                                                                                                    |
| <b>Compensation</b>                            | <i>You will receive around \$0.10-0.25 for completing each HIT, consisting of a single image and single attribute. We expect each task to take no more than 30-60 seconds on average. All funds will be paid through Mechanical Turk. All efforts will be made to make payment and approvals in a timely fashion.</i>                                                                                                                                                                                                                                                                                                                                                                                                                                  |
| <b>Qualification Test and Attention Checks</b> | <i>You all have partaken in a qualification test in order to verify the quality of your work. Your work will continue to be monitored via attention checks, which are images with known annotations randomly inserted into the pool of HITs for you to complete. If the quality of your work on these attention checks is subpar, we reserve the right to reject some of the HITs you complete. We do not wish to do so, so please try your best for all the HITs, as we will be checking.</i>                                                                                                                                                                                                                                                         |
| <b>Right to Withdraw and Questions</b>         | <i>Your participation in this research is completely voluntary. You may choose not to take part at all. If you decide to participate in this research, you may stop participating at any time. If you decide not to participate in this study or if you stop participating at any time, you will not be penalized or lose any benefits to which you otherwise qualify.</i><br><br><i>If you decide to stop taking part in the study, if you have questions, concerns, or complaints, or if you need to report an injury related to the research, please contact the investigator's point person:</i><br><br><b>Mazda Moayeri</b><br><b>4120 Brendan Iribe Center</b><br><b>8125 Paint Branch Dr, College Park, MD 20740</b><br><b>mmoayeri@umd.edu</b> |
| <b>Statement of Consent</b>                    | <i>Your signature indicates that you are at least 18 years of age; you have read this consent form or have had it read to you; your questions have been answered to your satisfaction and you voluntarily agree to participate in this research study. You may print a copy of this signed consent form.</i><br><br><i>If you agree to participate, please click "I agree/consent", and then hit submit.</i>                                                                                                                                                                                                                                                                                                                                           |

Figure 15: Consent Form. Workers who passed the qualification exam then moved on to sign a consent form, where the purpose of their work was explained, common mistakes were corrected, and an extra payment was awarded. This phase is intended to create an active dialogue between data annotators and collectors. We received many inquiries and enthusiastic bits of feedback.

**ATTENTION: EARN BONUSES BY COMPLETING MORE HITS**

We need these HITS in the next few days, so to incentive work, we will reward bonuses depending on the number of HITS you complete well.

The bonuses are **\$1 for 100 HITS, \$3 for 250 HITS, \$7 for 500 HITS**. Maximum one bonus per worker.

We have also **increased base pay by 33% permanently** (to \$0.2/hit). Complete HITS during this window to be eligible for bonuses and higher base pay.

**QUALITY MUST BE RETAINED!** We are monitoring performance and will not award pay if quality is low.

**Thank you for your work!** We appreciate your effort, and **your speed/focus on this task will be very helpful.**

---

**Object Segmentation: *Baseball Player***

Segment all Baseball Players in the image. Each segmentation should take 30-60 seconds on average; they can be slightly rough.

**Segmentation quality is being monitored.** Poor quality will lead to rejection of HITS and removal of qualification.

We recommend using the **polygon (p)** tool to segment. Be sure to **click enter after each use to finalize your selection** after each use, or else the segmentation will be lost.

---

**Tips for segmenting Baseball Players:** Avoid segmenting baseball bats when possible. Also avoid segmenting umpires (usually in black). Double check for multiple instances of baseball players, as there are often more than one in an image. You can use the same color to segment multiple players.

**Examples**





---

**Instructions**

Use the tools to label all instances of the class *Baseball Player* in the image. Below are example segmentations for this class.



[More Instructions](#)

Color in each 'Baseball Player' instance in the image



**Labels**

Choose a class below to add its instance(s).

- ▶ Baseball Player

---

p q b e d c t z o + m f Ctrl+z Ctrl+y

Nothing to label Submit

Figure 16: Example task for full data collection phase, only accessible to workers who passed the qualification exam and signed the consent form.
